1 **Required marker properties for unbiased estimates**  
2 **of the genetic correlation between populations**

3

4 Yvonne C.J. Wientjes\*, Mario P.L. Calus\*, Pascal Duenk\*, Piter Bijma\*

5

6 \* Wageningen University & Research, Animal Breeding and Genomics, 6700 AH

7 Wageningen, The Netherlands

8

9 Running title: Genetic correlation between populations

10

11 Key words: genetic correlation between populations, genomic relationships, marker-based

12 relationships, multi-trait model

13

14 Author information:

15 Yvonne Wientjes

16 Wageningen University & Research

17 Animal Breeding and Genomics

18 P.O. box 338, 6700 AH Wageningen, the Netherlands

19 E-mail: [yvonne.wientjes@wur.nl](mailto:yvonne.wientjes@wur.nl)

20 Phone: +31 317 481 904

21

22  
23  
24  
25  
26  
27  
28  
29  
30  
31  
32  
33  
34  
35  
36  
37  
38  
39  
40  
41  
42  
43  
44

## ABSTRACT

Populations generally differ in environmental and genetic factors, which can create differences in allele substitution effects between populations. Therefore, a single genotype may have different additive genetic values in different populations. The correlation between the two additive genetic values of a single genotype in both populations is known as the additive genetic correlation between populations and can differ from one. Our objective was to investigate whether differences in linkage disequilibrium (LD) and allele frequencies of markers and causal loci between populations affect bias of the estimated genetic correlation. We simulated two populations that were separated for 50 generations. Markers and causal loci were selected to either have similar or different allele frequencies in the two populations. Differences in consistency of LD between populations were obtained by using different marker density panels. Results showed that when the difference in allele frequencies of causal loci between populations was reflected by the markers, genetic correlations were only slightly underestimated using markers. This was even the case when LD patterns, measured by LD statistic  $r$ , were different between populations. When the difference in allele frequencies of causal loci between populations was not reflected by the markers, genetic correlations were severely underestimated. We conclude that for an unbiased estimate of the genetic correlation between populations, marker allele frequencies should reflect allele frequencies of causal loci so that marker-based relationships can accurately predict the relationships at causal loci, i.e.  $E(\mathbf{G}_{\text{causal loci}}|\mathbf{G}_{\text{markers}}) \neq \mathbf{G}_{\text{markers}}$ . Differences in LD between populations have little effect on the estimated genetic correlation.

45

## INTRODUCTION

46 Alleles in different populations are often expressed in a different environment and a  
47 different genetic background. As a result of genotype by environment interaction and non-  
48 additive genetic effects, those differences result in different allele substitution effects between  
49 populations (Fisher 1918; Fisher 1930; Falconer 1952). In addition, the set of loci underlying  
50 a trait can differ between populations. Therefore, a single genotype may have different  
51 additive genetic values in different populations. For each population, the additive genetic  
52 value is the product of the genotype, measured as allele count at each locus, multiplied by the  
53 allele substitution effects for that population. The additive genetic correlation between two  
54 populations is the correlation between the two additive genetic values of a single genotype in  
55 both populations and may considerably differ from one.

56 Knowledge of the genetic correlation between populations helps to understand the  
57 differences and similarities between populations in genetic architecture of complex traits (De  
58 Candia *et al.* 2013; Brown *et al.* 2016). For both genomic prediction and genome-wide  
59 association studies, combining information from populations is an attractive approach to  
60 increase the prediction accuracy of estimated genetic values or the power to identify  
61 quantitative trait loci. This is especially the case when the number of individuals with  
62 genotypes and phenotypes in a population is limited. For both genomic prediction as well as  
63 genome-wide association studies, the genetic correlation between populations determines the  
64 added benefit of combining information from multiple populations (De Candia *et al.* 2013;  
65 Wientjes *et al.* 2015; Wientjes *et al.* 2016). Therefore, the genetic correlation between  
66 populations is an important parameter in human studies (e.g., De Candia *et al.* 2013; Yang *et al.*  
67 2013), as well as in animal and plant breeding (e.g., Karoui *et al.* 2012; Lehermeier *et al.*  
68 2015).

69 For estimating a genetic correlation between two populations, it is essential to know the  
70 relationships between individuals from the two populations. Traditionally, relationships  
71 between individuals are based on pedigree information, which is generally only available  
72 within population. The current availability of genome-wide marker panels has opened up new  
73 opportunities to estimate genetic correlations between populations of distantly related  
74 individuals, such as between breeds (e.g., Karoui *et al.* 2012; Carillier *et al.* 2014), lines  
75 (Huang *et al.* 2014), sub-populations (e.g., Lehermeier *et al.* 2015), or ethnicities (e.g., De  
76 Candia *et al.* 2013; Yang *et al.* 2013). Genetic correlations between populations can be  
77 estimated using methods based on genomic relationships (Karoui *et al.* 2012), random  
78 regression on genotypes (Sørensen *et al.* 2012; Krag *et al.* 2013), or summary statistics of  
79 genome-wide association studies (Bulik-Sullivan *et al.* 2015; Brown *et al.* 2016). Wientjes *et*  
80 *al.* (2017) showed that an unbiased estimate of the genetic correlation can be obtained from  
81 genomic relationships based on causal loci.

82 Because causal loci are generally unknown, genomic relationships have to be based on  
83 marker information. The strength and phase of linkage disequilibrium (LD) between causal  
84 loci and markers is different between populations in humans (Sawyer *et al.* 2005), livestock  
85 (e.g., Heifetz *et al.* 2005; Veroneze *et al.* 2013) and plants (Flint-Garcia *et al.* 2003;  
86 Lehermeier *et al.* 2014). Due to imperfect LD between causal loci and markers, not all genetic  
87 variance is explained by the markers which can distort the estimation of genetic correlations  
88 (Bulik-Sullivan *et al.* 2015; Gianola *et al.* 2015). However, in a simulation study where  
89 populations had different LD patterns, the genetic correlation between populations was  
90 accurately estimated based on marker information (Wientjes *et al.* 2015).

91 The objective of this study was to investigate whether differences in LD and allele  
92 frequencies of markers and causal loci between populations affect bias of the estimated  
93 genetic correlation. We simulated two populations that were separated for 50 generations

94 using scenarios differing in consistency of LD and in allele frequencies of markers and causal  
95 loci between the populations. We used different marker-based relationship matrices to  
96 estimate the genetic correlation.

97

## MATERIALS AND METHODS

### 98 **Population structure**

99 Two populations were simulated using QMSim software (Sargolzaei and Schenkel 2009).

100 The simulations were set-up to have the following two characteristics; 1) the two populations  
101 should have different LD patterns, as measured by the LD statistic  $r$ , and 2) a large number of  
102 loci should segregate in the last generation of which a part (>200 000) has similar allele  
103 frequencies in both populations and another part (>200 000) different allele frequencies in  
104 both populations. We simulated a historical population for 212 generations. The first  
105 generation (generation -211) contained 300 individuals. In the following 100 generations  
106 (generation -211 – -112), population size gradually decreased to 50 individuals to create LD.  
107 From generation -111 to generation -12, population size gradually increased to 300  
108 individuals and was kept constant for the next 10 generations (generation -11 – -2). In the last  
109 generation of the historical population (generation -1), population size increased to 1800  
110 individuals.

111 The last generation of the historical population was randomly divided into two equally  
112 sized populations (A and B) of 900 individuals. In the next generation, the size of both  
113 populations was increased to 1800 individuals and was kept constant for the following 40  
114 generations (generation 1-40). Those reasonably large population sizes limited the drift of  
115 allele frequencies. Number of offspring was set to 10 and selection was at random, so the  
116 number of selected offspring per individual approximately followed a Poisson distribution, as  
117 assumed in the Wright-Fisher model of genetic drift. In the last 10 generations (generation 41-  
118 50), population size decreased to 120 individuals in each population to increase the extent of  
119 LD in each population, and the number of offspring was set to 20. In the entire simulation, the  
120 male to female ratio was 1:5, generations were not overlapping and mating was at random. All  
121 individuals from the last generation (2000) were used for the analyses.

122

### 123 **Genome size**

124 A genome of 10 chromosomes of one Morgan each was simulated. This genome size was a  
125 balance between the computational effort of the analyses and the variation in relationships  
126 between family members. By using fewer chromosomes, computational effort reduced, but  
127 variation in relationships around their expectation based on the pedigree would have been  
128 inflated (Hill 1993). Each chromosome contained 300 000 randomly spaced loci, with a  
129 recurrent mutation rate of 0.00005 in the historical population. In the last generation of the  
130 historical population, segregating loci were selected and mutation was stopped. The chosen  
131 population size and mutation rate resulted in a U-shaped allele frequency distribution of loci  
132 in the two populations, as commonly found in real populations.

133 In the last generation (generation 50), markers and 2000 causal loci were selected from all  
134 segregating loci. Three marker panels were constructed: a High Density Panel (HDP) with  
135 200 000 markers, a Low Density Panel (LDP) with 20 000 markers, and a Very Low Density  
136 Panel (VLDP) with 2000 markers. Each of the smaller marker panels was a subset from the  
137 larger marker panels. The different marker densities were used to represent differences in  
138 consistency of LD between populations, since consistency in LD decreases when genomic  
139 distance between markers and causal loci increases (De Roos et al. 2008).

140 Markers and causal loci were selected to either have similar or different allele frequencies  
141 in population A and B. For both approaches, three selection criteria were used; namely (1) the  
142 segregation in one or both populations, (2) the absolute difference in allele frequency between  
143 population A ( $p_A$ ) and population B ( $p_B$ ), and (3) the difference in variance explained by a  
144 locus between population A and B, when allele substitution effects would be the same in both  
145 populations. The last criterion was mainly effective for loci with a low allele frequency, since



146 an apparently small difference in allele frequency can result in a relatively large difference in  
147 variance explained for those loci.

148 For selecting markers with similar allele frequencies in the two populations, loci had to (1)  
149 segregate in both populations, (2)  $|p_A - p_B|$  should be less than 0.14, and (3)  
150  $|2p_A(1-p_A) - 2p_B(1-p_B)|/[2\bar{p}_{AB}(1-\bar{p}_{AB})]$  should be less than 2, where  $\bar{p}_{AB}$  was the average  
151 of  $p_A$  and  $p_B$ . For selecting markers with different allele frequencies in the two populations,  
152 (1) loci had to segregate in at least one population, (2)  $|p_A - p_B|$  should be more than 0.14, and  
153 (3)  $|2p_A(1-p_A) - 2p_B(1-p_B)|/[2\bar{p}_{AB}(1-\bar{p}_{AB})]$  should be more than 1. The cut-off values  
154 were chosen to either minimize or maximize the difference in allele frequencies between the  
155 populations, while ensuring that enough loci in each replicate met the criteria. We aimed to  
156 select marker panels with a uniform allele frequency distribution to reflect commercially  
157 available marker chips (Matsuzaki *et al.* 2004; Matukumalli *et al.* 2009; Ramos *et al.* 2009;  
158 Groenen *et al.* 2011). For this step, the loci that met the criteria were divided in 50 bins based  
159 on average allele frequency over the two populations (i.e., allele frequencies of bin 1 ranged  
160 from 0 – 0.02, of bin 2 from 0.02 – 0.04, etc.) and from each bin an equal number of loci was  
161 randomly selected. When the number of loci was too small in the two extreme bins (0.00 –  
162 0.02, and 0.98 – 1.00), the bins were combined with the neighboring bin.

163 For selecting causal loci, the same criteria and cut-off values were used as for markers,  
164 with one exception. For the scenario where allele frequencies in the two populations were  
165 similar, causal loci did not have to segregate in both populations, since some causal loci are  
166 known to be at least partly population-specific (Kemper *et al.* 2015). As an additional  
167 criterion, causal loci could not already be selected as marker. Causal loci were randomly  
168 selected from all loci that met the criteria, and therefore their allele frequency pattern

169 followed an approximate U-shaped distribution as expected for causal loci (Yang *et al.* 2010;  
170 Kemper and Goddard 2012).

171

## 172 **LD patterns and consistency of LD**

173 The LD pattern and consistency in LD between the populations was investigated. Within  
174 each population and between all causal loci and markers less than 10 cM apart, the parameter  
175  $r$  was calculated (Hill and Robertson 1968):

$$176 \quad r = \frac{(f_{11}f_{22} - f_{12}f_{21})}{\sqrt{f_{.1}f_{.2}f_{1.}f_{2.}}},$$

177 where  $f_{11}$  is the haplotype frequency with allele 1 at the first locus and allele 1 at the second  
178 locus,  $f_{22}$ ,  $f_{12}$  and  $f_{21}$  are frequencies of the other possible haplotypes,  $f_{.1}$  and  $f_{.2}$  are the  
179 frequencies of allele 1 and allele 2 at the first locus, and  $f_{1.}$  and  $f_{2.}$  are the frequencies of allele  
180 1 and allele 2 at the second locus. The LD pattern within each population was represented by  
181 the average  $r^2$  for intervals of 0.1 cM distance between the markers. The consistency of LD  
182 between the two populations was calculated as the correlation between  $r$  values of the two  
183 populations for intervals of 0.1 cM, following De Roos *et al.* (2008).

184

## 185 **Phenotypes**

186 For each causal locus, allele substitution effects were sampled from a bivariate normal  
187 distribution, with mean 0, standard deviation 1, and a correlation between the populations of  
188 either 1, 0.8, 0.6, 0.4, 0.2 or 0. For each individual, its allele counts for the causal loci (coded  
189 as 0, 1, and 2) were multiplied by the corresponding allele substitution effects and results  
190 were summed over loci to calculate the additive genetic value (AGV) of the individual. The  
191 AGV were scaled to a mean of 0 and variance of 1 across all individuals. Since allele  
192 substitution effects were sampled independently from allele frequency, the correlation

193 between AGV of population 1 and 2 (i.e., genetic correlation) was similar to the correlation  
 194 between allele substitution effects (i.e., either 1, 0.8, 0.6, 0.4, 0.2 or 0). A normally-distributed  
 195 environmental effect was sampled for each individual to obtain a heritability of 0.3 in each  
 196 population. Phenotypes of all 2000 individuals in generation 50 were computed by summing  
 197 the AGV and the environmental effects.

198

### 199 **Estimating the genetic correlation**

200 The additive genetic correlation between populations was estimated using the following  
 201 bivariate model:

$$202 \begin{bmatrix} \mathbf{y}_A \\ \mathbf{y}_B \end{bmatrix} = \begin{bmatrix} \mathbf{x}_A & 0 \\ 0 & \mathbf{x}_B \end{bmatrix} \begin{bmatrix} \mu_A \\ \mu_B \end{bmatrix} + \begin{bmatrix} \mathbf{Z}_A & 0 \\ 0 & \mathbf{Z}_B \end{bmatrix} \begin{bmatrix} \mathbf{a}_A \\ \mathbf{a}_B \end{bmatrix} + \begin{bmatrix} \mathbf{e}_A \\ \mathbf{e}_B \end{bmatrix},$$

203 where  $\mathbf{y}_k$  is a vector with phenotypes for population  $k$  ( $k= A, B$ ),  $\mathbf{x}_k$  is an incidence vector  
 204 relating phenotypes to the mean in population  $k$  ( $\mu_k$ ),  $\mathbf{Z}_k$  is an incidence matrix relating  
 205 phenotypes to estimated additive genetic values ( $\mathbf{a}_k \sim \mathbf{N} \left( \begin{bmatrix} \mathbf{0} \\ \mathbf{0} \end{bmatrix}, \begin{bmatrix} \mathbf{G}_{AA} & \mathbf{G}_{AB} \\ \mathbf{G}_{BA} & \mathbf{G}_{BB} \end{bmatrix} \otimes \begin{bmatrix} \sigma_A^2 & \sigma_{AB} \\ \sigma_{AB} & \sigma_B^2 \end{bmatrix} \right)$ )

206 with  $\otimes$  representing the Kronecker product function, and  $\mathbf{e}_k$  are vectors with independent  
 207 residual effects. Genetic and residual variances were estimated using REML. The first  
 208 analyses were performed using ASReml software (Gilmour *et al.* 2015). For the scenarios  
 209 analyzed later, we switched to MTG2 (Lee and van der Werf 2016) to reduce computation  
 210 time. We verified that the estimated variance components were identical using both programs.

211 The genomic relationship matrix ( $\mathbf{G}$ ) between all individuals was calculated as (Wientjes *et*  
 212 *al.* 2017):

$$213 \mathbf{G} = \begin{bmatrix} \mathbf{G}_{AA} & \mathbf{G}_{AB} \\ \mathbf{G}_{BA} & \mathbf{G}_{BB} \end{bmatrix} = \begin{bmatrix} \frac{\mathbf{W}_A \mathbf{W}_A'}{\sum 2p_{Ai}(1-p_{Ai})} & \frac{\mathbf{W}_A \mathbf{W}_B'}{\sqrt{\sum 2p_{Ai}(1-p_{Ai})} \sqrt{\sum 2p_{Bi}(1-p_{Bi})}} \\ \frac{\mathbf{W}_B \mathbf{W}_A'}{\sqrt{\sum 2p_{Ai}(1-p_{Ai})} \sqrt{\sum 2p_{Bi}(1-p_{Bi})}} & \frac{\mathbf{W}_B \mathbf{W}_B'}{\sum 2p_{Bi}(1-p_{Bi})} \end{bmatrix}$$

214

215 where  $\mathbf{W}_k$  is a matrix with centered allele counts of all individuals from population  $k$ , and  $p_{ki}$   
216 is the allele frequency for locus  $i$  in population  $k$ . Centered allele counts were calculated as  $g_{ijk}$   
217  $- 2p_{ik}$ , where  $g_{ijk}$  is the allele count of locus  $i$  for individual  $j$  from population  $k$ , coded as 0, 1  
218 or 2. This  $\mathbf{G}$  defines the relationships as standardized covariances between the genetic values  
219 of individuals (Wientjes *et al.* 2017). In all scenarios and in all 50 replicates, we calculated  $\mathbf{G}$   
220 using allele counts of 1) causal loci, 2) HDP markers, 3) LDP markers, or 4) VLDP markers.

221 The relationships at causal loci are the true relationships for that trait, that are  
222 approximated when using markers. Marker-based relationships are subject to sampling error,  
223 since markers are a subset of the genome. A way to account for this sampling error is by  
224 regressing  $\mathbf{G}$  towards the pedigree relationship matrix ( $\mathbf{A}$ ) (Powell *et al.* 2010; Yang *et al.*  
225 2010; Goddard *et al.* 2011), which is expected to reduce bias of estimated variance  
226 components (Yang *et al.* 2010). To investigate the effect of this regression,  $\mathbf{G}$  matrices based  
227 on the three marker panels were regressed towards  $\mathbf{A}$  and used for the scenarios with a  
228 correlation of 0.8 or 0.4.

229 Before regressing  $\mathbf{G}$  towards  $\mathbf{A}$ , the inbreeding level of each within-population block in  $\mathbf{G}$   
230 was rescaled to the inbreeding level in  $\mathbf{A}$ , following (Powell *et al.* 2010):

$$231 \quad \mathbf{G}^* = (1 - \overline{F}_k) \mathbf{G} + 2\overline{F}_k \mathbf{J},$$

232 where  $\overline{F}_k$  is the average inbreeding coefficient of all individuals of population  $k$  based on the  
233 pedigree, and  $\mathbf{J}$  is a matrix of ones. The rescaled  $\mathbf{G}^*$  was regressed towards  $\mathbf{A}$  following  
234 (Yang *et al.* 2010; Goddard *et al.* 2011):

$$235 \quad \hat{\mathbf{G}} = \mathbf{A} + b(\mathbf{G}^* - \mathbf{A}),$$

236 with

$$237 \quad b = \frac{\text{Var}(\mathbf{G}^* - \mathbf{A})}{\text{Var}(\mathbf{G}^* - \mathbf{A}) + \frac{1}{n}},$$

238 where  $n$  is the number of markers. To set-up **A**, the pedigree of the last 10 generations was  
239 used, so that between-population **A** relationships were zero. The regression was done  
240 separately within each population per bin of pedigree relationships (<0.10, 0.10-0.25, 0.25-  
241 0.50, >0.5) and between populations, since regression coefficients are higher for higher  
242 pedigree relationships (Veerkamp *et al.* 2011; Wientjes *et al.* 2013). For the diagonal  
243 elements, only the inbreeding coefficients were regressed (Yang *et al.* 2010). Regression  
244 coefficients were all close to one for higher marker density panels (>0.99 for HDP and >0.97  
245 for LDP). For VLDP markers, regression coefficients were lower; ~0.84 for between-  
246 population relationships, ~0.89, ~0.91, ~0.94 and ~0.96 for the four bins of within-population  
247 relationships, and ~0.93 for inbreeding coefficients.

248

#### 249 **Data availability**

250 Supplemental Material, File S1, is available at FigShare. This file contains the input file used  
251 for QMSim, the Fortran-programs to select markers and causal loci for the different scenarios,  
252 the Fortran-program to simulate phenotypes and the seeds for the different programs in each  
253 of the replicates.

254

## RESULTS

### 255 **Characteristics of simulations**

256 The criteria for selecting markers and causal loci resulted in clear differences between the  
257 scenarios with similar and different allele frequencies in the two populations (Figure 1). As  
258 intended, the allele frequency distribution was uniform for markers and U-shaped for causal  
259 loci (not shown). Therefore, the percentage of causal loci with a minor allele frequency below  
260 0.05 was higher (on average 33% in each population) than the percentage of markers with a  
261 minor allele frequency below 0.05 (on average only 15% in each population). The decay of  
262 LD was similar in both populations (Figure 2), with a strong decay of LD at increasing  
263 distances between the loci at the 0 – 2 cM interval. The consistency of LD phase decreased  
264 rapidly at short distances (0 – 5 cM), and fluctuated around zero at distances larger than 5 cM.

265

### 266 **Proportion of variance explained**

267 The proportion of the phenotypic variance explained by the markers, known as the  
268 genomic heritability (De los Campos *et al.* 2015), was close to the simulated heritability for  
269 all scenarios (not shown). This implies that genetic variances were accurately estimated using  
270 all three marker panels.

271

### 272 **Estimated genetic correlation**

273 With relationships based on causal loci, all estimated genetic correlations were unbiased,  
274 irrespective of whether causal loci had similar or different allele frequencies in the two  
275 populations (Figure 3). This was also expected based on previous results (Wientjes *et al.*  
276 2017).

277 With relationships based on markers, all estimated genetic correlations were biased. When  
278 marker-based relationships were not regressed towards the pedigree relationships, genetic

279 correlations were only slightly underestimated when the difference in allele frequencies of  
280 causal loci between populations was reflected by the markers, i.e., when markers and causal  
281 loci both had similar or different allele frequencies in the two populations (Figure 3A and 3C;  
282 ~2.5% for HDP, ~3% for LDP, and ~11% for VLDP). The genetic correlation was much more  
283 severely underestimated when the difference in allele frequencies of causal loci between  
284 populations was not reflected by the markers (Figure 3B; ~28% for HDP, ~30% for LDP, and  
285 ~41% for VLDP).

286 Across all scenarios, regressing  $\mathbf{G}$  towards the pedigree relationship matrix only had a  
287 small effect on the estimated genetic correlation (Figure 4). At a high marker density,  
288 regressing  $\mathbf{G}$  lowered the estimated genetic correlation. Therefore, the underestimation for  
289 HDP and LDP markers increased from ~4% to ~9% when the difference in allele frequencies  
290 of causal loci between populations was reflected by the markers, and from ~28% to ~32%  
291 when the difference in allele frequencies of causal loci between populations was not reflected  
292 by the markers. In contrast, regressing  $\mathbf{G}$  resulted in higher estimated genetic correlations at  
293 low marker density. For VLDP markers, the underestimation decreased from ~12% to ~8%  
294 when the difference in allele frequencies of causal loci between populations was reflected by  
295 the markers, and from ~41% to ~38% when the difference in allele frequencies of causal loci  
296 between populations was not reflected by the markers. Thus, regressing  $\mathbf{G}$  was only beneficial  
297 for estimating the genetic correlation between populations when the marker density was low.

298 Standard errors across replicates for the estimated genetic correlation were generally small  
299 for all scenarios (~0.02), and tended to be slightly larger for lower true genetic correlations.  
300 Moreover, standard errors were slightly larger when the difference in allele frequencies of  
301 causal loci between populations was not reflected by the markers (Figure 3B versus Figure 3A  
302 and 3C). Regression of  $\mathbf{G}$  towards the pedigree relationship matrix had no effect on the  
303 standard error.

304

## 305 **Genomic relationships**

306 Genetic variance estimates are biased when the regression of true relationships on marker-  
307 based relationships is not equal to one (Goddard *et al.* 2011). We investigated whether this  
308 could explain the underestimation of the genetic correlation by considering the genomic  
309 relationships at the causal loci as the true relationships for that trait. In Figure 5 and 6, we  
310 plotted the relationships at the causal loci versus the unregressed relationships at the markers  
311 for one of the replicates. The regression coefficients for within-population genomic  
312 relationships were close to one, and were only slightly lower when causal loci had different  
313 allele frequencies (Figure 6) compared to similar allele frequencies (Figure 5) in the two  
314 populations. This means that the within-population relationships at the markers can quite  
315 accurately predict the relationships at the causal loci.

316 Regression coefficients of between-population relationships deviated more from one,  
317 especially at low marker density. When the difference in allele frequencies of causal loci  
318 between populations was reflected by the markers, the regression coefficients were  $\sim 0.8$  for  
319 HDP and LDP, and 0.67 for VLDP (Figure 5). This means that the relationships at the  
320 markers overpredict the relationships at the causal loci. When the difference in allele  
321 frequencies of causal loci between populations was not reflected by the markers, regression  
322 coefficients of between-population relationships were  $\sim 0.30$  (Figure 6). Thus the  
323 overprediction of between-population relationships using markers was much larger when the  
324 difference in allele frequency of the causal loci between the populations was not reflected by  
325 the markers.

326 The correlation between the relationships at the causal loci and at the markers, i.e., the  
327 accuracy of the marker-based relationships, decreased when the density of the markers  
328 decreased (Figure 5 and 6). When the difference in allele frequencies of causal loci between



329 populations was reflected by the markers, the correlation for within-population relationships  
330 was ~0.91 for HDP and LDP, and ~0.88 for VLDP. The correlation for between-population  
331 relationships was ~0.70 for HDP and LDP, and 0.60 for VLDP. The correlation between  
332 relationships at causal loci and at markers was much lower when the difference in allele  
333 frequencies of causal loci between populations was not reflected by the markers (within-  
334 population relationships: ~0.66 for HDP and LDP, ~0.63 for VLDP; between-population  
335 relationships: ~0.09 for HDP and LDP, ~0.08 for VLDP).

336

## DISCUSSION

337 The objective of this study was to investigate whether differences in LD and allele  
338 frequencies of markers and causal loci between populations affect bias of the estimated  
339 genetic correlation between populations. Results showed that when a difference in allele  
340 frequencies of causal loci between populations was reflected by the markers, estimated  
341 genetic correlations were only slightly underestimated using markers. This was even the case  
342 when LD patterns, as measured by LD-statistic  $r$ , were different between populations. When  
343 the difference in allele frequencies of causal loci between populations was not reflected by the  
344 markers, genetic correlations were severely underestimated. Differences in LD and allele  
345 frequencies of causal loci between populations only had a very slight effect on the precision  
346 of the estimated genetic correlation.

347

### 348 **Estimating the genetic correlation using marker-based relationships**

349 Genetic variance and heritability estimates are known to be biased when the regression  
350 coefficient of the true relationships on the marker-based relationships is not equal to one, i.e.,  
351 when  $E(\mathbf{G}_{\text{causal loci}}|\mathbf{G}_{\text{markers}}) \neq \mathbf{G}_{\text{markers}}$  (Yang *et al.* 2010; Goddard *et al.* 2011; Yang *et al.*  
352 2015). When this regression coefficient is below one, relationships at the markers show too  
353 much variation, resulting in an underestimation of the genetic variance. Yang *et al.* (2010)  
354 argued that a regression coefficient smaller than one can be a result of two effects; 1)  
355 sampling error on the relationships because the number of markers is finite, and 2) a  
356 difference in allele frequency distribution between causal loci and markers. In all our  
357 scenarios, the number of markers was finite and the allele frequency distribution was different  
358 for causal loci than for markers. However, within populations, the estimated genomic  
359 heritability (De los Campos *et al.* 2015) was close to the simulated trait heritability for all  
360 scenarios. This suggests that enough markers were used to constrain the sampling error on

361 within-population relationships to an acceptable level, and that our estimated genetic  
362 variances were only slightly affected by the difference in allele frequency distribution  
363 between causal loci and markers. Thus the underestimation of the genetic correlation between  
364 populations is not a result of biased genetic variance estimates.

365 The relative sampling error as a result of using a finite number of markers was much larger  
366 for between-population relationships than for within-population relationships, because more  
367 markers are needed to accurately estimate the small between-population relationships  
368 (Goddard *et al.* 2011). Moreover, the accuracy of predicting the between-population  
369 relationships at the causal loci using markers was depending on the reflection of the  
370 difference in allele frequency of causal loci between populations by the markers. Those two  
371 effects can result in an underestimated genetic covariance between populations, which can  
372 explain the slight underestimation of the genetic correlation in the scenarios where the  
373 difference in allele frequencies of causal loci between the populations was reflected by the  
374 markers, and the more severe underestimation in the scenarios where this was not the case.  
375 The higher sampling error on between-population relationships can also explain the larger  
376 underestimation of the genetic correlation for VLDP markers than for HDP and LDP markers.  
377 Thus for estimating the genetic correlation between populations, it is important that the  
378 difference in allele frequencies of causal loci between the populations is reflected by the  
379 markers and that the number of markers is high.

380

### 381 **Regression of the maker-based relationships**

382 Regressing  $\mathbf{G}$  towards the pedigree relationship matrix is a way to correct the marker-  
383 based relationships for the sampling error as a result of using a finite number of markers  
384 (Powell *et al.* 2010). The regression was strongest for VLDP markers, where it reduced the  
385 underestimation of the genetic correlation. Those results agree with the findings that

386 regressing  $\mathbf{G}$  is important when the number of markers is low (Yang *et al.* 2010) and supports  
387 our statement that relationships at VLDP markers were affected by sampling error. However,  
388 regressing  $\mathbf{G}$  increased the underestimation of the genetic correlation with HDP and LDP  
389 markers. The reason for this is not clear. It might be that the regression of  $\mathbf{G}$  not only reduces  
390 the sampling error, but also amplifies the effect of the difference in allele frequency  
391 distribution of causal loci and markers.

392 In our study, regressing  $\mathbf{G}$  towards  $\mathbf{A}$  was detrimental for estimating the genetic correlation  
393 when using HDP (200 000) or LDP (20 000) markers, where all regression coefficients were  
394 close to one, and regressing was beneficial when using VLDP (2000) markers, where  
395 regression coefficients were considerably below one. The simulated genome was about one  
396 third of the genome of livestock species such as cattle and chicken (Ihara *et al.* 2004; Groenen  
397 *et al.* 2009). This would indicate that regressing  $\mathbf{G}$  is detrimental when using a genome-wide  
398 total of 60 000 or more markers in livestock. Note that this number of markers will depend on  
399 the consistency in LD between populations. Between-population relationships are all closer to  
400 zero when consistency in LD between populations is lower (Goddard 2009). Those lower  
401 relationships generally require more markers to reduce their relative sampling error to an  
402 acceptable level (Yang *et al.* 2010). Hence, we think that the regression coefficients may be a  
403 better indicator for deciding whether or not to regress  $\mathbf{G}$ ; when all regression coefficients are  
404 close to one, e.g., above 0.95, it is probably better to not regress  $\mathbf{G}$  towards  $\mathbf{A}$  when estimating  
405 the genetic correlation between populations.

406 The coefficients to regress  $\mathbf{G}$  towards  $\mathbf{A}$  were approximated using the number of markers  
407 and the variation in  $\mathbf{G}_{\text{markers}}-\mathbf{A}$ , assuming that the sampling error was only a result of using a  
408 limited number of markers (Goddard *et al.* 2011). To investigate the impact of this  
409 approximation and whether we could remove the observed underestimation of the genetic  
410 correlation by rescaling  $\mathbf{G}_{\text{markers}}$  such that  $E(\mathbf{G}_{\text{causal loci}}|\mathbf{G}_{\text{markers}}) = \mathbf{G}_{\text{markers}}$ , we repeated some

411 analysis using  $b = \frac{Cov(\mathbf{G}_{\text{causal loci}} - \mathbf{A}, \mathbf{G}_{\text{markers}} - \mathbf{A})}{Var(\mathbf{G}_{\text{markers}} - \mathbf{A})}$  (Goddard *et al.* 2011) as regression

412 coefficient to regress  $\mathbf{G}$  towards  $\mathbf{A}$ . This regression requires the causal loci to be known,  
413 which was the case in our simulations. We calculated  $b$  separately for within- and between-  
414 population relationships, using 11 bins based on pedigree relationships within populations  
415 ( $<0.05$ ,  $0.05-0.10$ ,  $0.10-0.15$ ,  $0.15-0.20$ ,  $0.20-0.25$ ,  $0.25-0.30$ ,  $0.30-0.35$ ,  $0.35-0.40$ ,  $0.40-0.50$ ,  
416  $>0.50$ , self-relationships) and 3 bins based on genomic relationships between populations ( $<$ -  
417  $0.10$ ,  $-0.10-0.10$ ,  $>0.10$ ), and used those  $b$ 's to rescale the relationships. As shown in Figure 7,  
418 this rescaling almost completely removed the bias in genetic correlation estimates using HDP  
419 and LDP markers. The genetic correlation was overestimated when using rescaled  
420 relationships based on VLDP markers. This might be a result of the much larger sampling  
421 error for VLDP markers compared to HDP and LDP markers, which could result in  
422 underestimated  $b$  values. Thus, there appears to be a lower boundary for the number of  
423 markers to calculate between-population genomic relationships that can be corrected using  
424 regression. Altogether, those results confirm that for an unbiased estimate of the genetic  
425 correlation between populations, the regression coefficient of true relationships on marker-  
426 based relationships should be one.

427

## 428 **Consistency in LD**

429 We used different marker densities to represent differences in consistency in LD between  
430 populations. We expected that a lower consistency in LD would reduce the estimated genetic  
431 correlation between populations, because it reduces the correlation between (apparent) marker  
432 effects. Surprisingly, our results showed that estimated genetic correlations were similar with  
433 HDP and LDP markers, and only slightly lower with VLDP markers. This can be explained  
434 by the potential of marker-based relationships to accurately predict the relationships at the

435 causal loci, which is essential to unbiasedly estimate the genetic (co)variances and the genetic  
436 correlation between populations. A lower consistency in LD between populations results in a  
437 lower variation in between-population relationships (Goddard 2009; Goddard *et al.* 2011).  
438 Because a lower consistency in LD reduces the variation in between-population relationships  
439 at both causal loci and markers, the regression coefficient of the relationships at the causal  
440 loci on the relationships at the markers may not be affected much (Figure 5 and 6; HDP and  
441 LDP markers). Therefore, the estimated genetic correlation between populations seems little  
442 affected by the consistency in LD between the populations.

443 The consistency in LD between populations does affect the correlation between the  
444 relationships at the causal loci and the marker-based relationships (Figure 5 and 6), i.e., the  
445 accuracy of the marker-based relationships. For an unbiased estimate of the genetic  
446 correlation between populations, the regression of true relationships on marker-relationships  
447 should be one and marker-based relationships don't necessarily have to be accurate. This is in  
448 contrast to estimating genetic values, as is done in genomic prediction, for which relationships  
449 have to be accurate and have to show variation (Goddard *et al.* 2011). Thus, an unbiased  
450 estimate of the genetic correlation between populations does not guarantee that accurate  
451 genomic prediction across populations can be performed.

452

### 453 **LD structure**

454 The extent and consistency of LD in the simulated populations is comparable to the  
455 patterns found in chicken and pig populations (Andreescu *et al.* 2007; Badke *et al.* 2012;  
456 Veroneze *et al.* 2013; Veroneze *et al.* 2014). This simulated LD was much higher than  
457 generally found in human populations (Pritchard and Przeworski 2001; Shifman *et al.* 2003).  
458 Since marker density, and thereby the average LD between causal loci and nearest marker,

459 had no effect on the estimated genetic correlation, it is expected that the simulated LD pattern  
460 did not affect the results.

461 We simulated causal loci randomly spread across the genome, which is not always the case  
462 in real populations. When causal loci are enriched in regions with either high or low LD,  
463 (co)variance estimates can be over- or underestimated (Speed *et al.* 2012; Yang *et al.* 2015).  
464 However, we would expect a smaller impact of the heterogeneity of LD on the estimated  
465 genetic correlation than on the heritability, since differences in LD across the genome affect  
466 both the genetic variance and covariance estimates. This mechanism may also explain why  
467 genetic correlation estimates between traits within a population are less affected by  
468 incomplete LD between causal loci and markers than genetic variance estimates (Trzaskowski  
469 *et al.* 2013).

470

#### 471 **Genomic relationship matrix**

472 The current generation within each population was used as base population for our  
473 genomic relationships, since we used current population-specific allele frequencies. This  
474 means that between-population relationships are on average zero. When the consistency in LD  
475 between the populations is not zero, due to the existence of a recent or distant common  
476 ancestor, between-population relationships will show variation around zero (Goddard 2009).  
477 That variation is essential in order to estimate the genetic correlation between populations,  
478 and genetic correlation estimates are more precise when the variation in between-population  
479 relationships is higher (Visscher *et al.* 2014).

480 Another commonly used multi-population  $\mathbf{G}$  matrix is the matrix following Chen *et al.*  
481 (2013). We repeated part of our analyses using that matrix, where the scaling factor of the  
482 block between populations is  $\sum 2\sqrt{p_{Ai}(1-p_{Ai})p_{Bi}(1-p_{Bi})}$  ( $\mathbf{G}_{\text{Chen}}$ ) instead of  
483  $\sqrt{\sum 2p_{Ai}(1-p_{Ai})}\sqrt{\sum 2p_{Bi}(1-p_{Bi})}$  ( $\mathbf{G}_{\text{Wientjes}}$ ). In agreement with our previous study based

484 on causal loci (Wientjes *et al.* 2017), we found that genetic correlations were underestimated  
485 using  $\mathbf{G}_{\text{Chen}}$ . This underestimation is mainly a result of effectively removing markers  
486 segregating in only one population from the scaling factor of between-population  
487 relationships. This underestimation increases when those markers were also removed from  
488 within-population relationships, because it increased the bias in genetic variance estimates.  
489 Moreover,  $\mathbf{G}_{\text{Chen}}$  was more prone to singularities than  $\mathbf{G}_{\text{Wientjes}}$ . In  $\mathbf{G}_{\text{Wientjes}}$ , markers  
490 segregating in only one population contributed to the scaling factor for between-population  
491 relationships, which resulted in lower between-population relationships when the number of  
492 markers segregating in only one population was higher. This resulted in a larger difference  
493 between within- and between-population relationships in  $\mathbf{G}_{\text{Wientjes}}$ , which reduced the risk of  
494 singularities.

495

## 496 **Implications**

497 Marker panels are generally composed to have intermediate allele frequencies across  
498 multiple populations (Matsuzaki *et al.* 2004; Matukumalli *et al.* 2009; Groenen *et al.* 2011).  
499 Therefore, markers tend to have a higher average minor allele frequency than causal loci  
500 (Yang *et al.* 2010; Kemper and Goddard 2012). Moreover, the difference in allele frequencies  
501 of causal loci between populations is probably not accurately represented by markers. Those  
502 factors likely result in underestimated genetic correlations between populations using real  
503 data, but the impact of each of the factors requires further research.

504

## 505 **Conclusion**

506 For an unbiased estimate of the genetic correlation between populations from marker  
507 information, it is important that marker-based relationships accurately predict the  
508 relationships at causal loci, i.e.,  $E(\mathbf{G}_{\text{causal loci}}|\mathbf{G}_{\text{markers}}) = \mathbf{G}_{\text{markers}}$ . To achieve this, the difference



509 in allele frequencies of causal loci between the populations should be reflected by the  
510 markers, and the number of markers should be sufficiently high to constrain the sampling  
511 error on between-population relationships to an acceptable level. The consistency in LD  
512 between populations has little effect on the bias of the estimated genetic correlation.  
513

514

## ACKNOWLEDGMENTS

515       This study was financially supported by NWO-TTW and the Breed4Food partners Cobb  
516 Europe, CRV, Hendrix Genetics and Topigs Norsvin. The use of the HPC cluster has been  
517 made possible by CAT-AgroFood (Shared Research Facilities Wageningen UR).

518

519  
520  
521  
522  
523  
524  
525  
526  
527  
528  
529  
530  
531  
532  
533  
534  
535  
536  
537  
538  
539  
540  
541  
542  
543

## LITERATURE CITED

- Andreescu, C., S. Avendano, S. R. Brown, A. Hassen, S. J. Lamont, *et al.*, 2007 Linkage disequilibrium in related breeding lines of chickens. *Genetics* 177: 2161-2169.
- Badke, Y. M., R. O. Bates, C. W. Ernst, C. Schwab and J. P. Steibel, 2012 Estimation of linkage disequilibrium in four US pig breeds. *BMC Genom.* 13: 1.
- Brown, B. C., C. J. Ye, A. L. Price and N. Zaitlen, 2016 Transethnic genetic-correlation estimates from summary statistics. *Am. J. Hum. Genet.* 99: 76-88.
- Bulik-Sullivan, B., H. K. Finucane, V. Anttila, A. Gusev, F. R. Day, *et al.*, 2015 An atlas of genetic correlations across human diseases and traits. *Nat. Genet.* 47: 1236-1241.
- Carillier, C., H. Larroque and C. Robert-Granié, 2014 Comparison of joint versus purebred genomic evaluation in the French multi-breed dairy goat population. *Genet. Sel. Evol.* 46: 67.
- Chen, L., F. Schenkel, M. Vinsky, D. Crews and C. Li, 2013 Accuracy of predicting genomic breeding values for residual feed intake in Angus and Charolais beef cattle. *J. Anim. Sci.* 91: 4669-4678.
- De Candia, T. R., S. H. Lee, J. Yang, B. L. Browning, P. V. Gejman, *et al.*, 2013 Additive genetic variation in schizophrenia risk is shared by populations of African and European descent. *Am. J. Hum. Genet.* 93: 463-470.
- De los Campos, G., D. Sorensen and D. Gianola, 2015 Genomic Heritability: What Is It? *PLoS Genet.* 11: e1005048.
- De Roos, A. P. W., B. J. Hayes, R. J. Spelman and M. E. Goddard, 2008 Linkage disequilibrium and persistence of phase in Holstein-Friesian, Jersey and Angus cattle. *Genetics* 179: 1503-1512.
- Falconer, D. S., 1952 The problem of environment and selection. *Amer. Nat.* 86: 293-298.

- 544 Fisher, R. A., 1918 The correlation between relatives on the supposition of Mendelian  
545 inheritance. *Trans. Roy. Soc. Edinburgh* 52: 399-433.
- 546 Fisher, R. A., 1930 *The genetical theory of natural selection*. Oxford University Press,  
547 Oxford, United Kingdom.
- 548 Flint-Garcia, S. A., J. M. Thornsberry and E. S. Buckler IV, 2003 Structure of linkage  
549 disequilibrium in plants. *Annu. Rev. Plant Biol.* 54: 357-374.
- 550 Gianola, D., G. De los Campos, M. A. Toro, H. Naya, C.-C. Schön, *et al.*, 2015 Do molecular  
551 markers inform about pleiotropy? *Genetics* 201: 23-29.
- 552 Gilmour, A. R., B. J. Gogel, B. R. Cullis, S. J. Welham and R. Thompson, 2015 *ASReml user*  
553 *guide release 4.1*. VSN International Ltd, Hemel Hempstead.
- 554 Goddard, M. E., 2009 Genomic selection: Prediction of accuracy and maximisation of long  
555 term response. *Genetica* 136: 245-257.
- 556 Goddard, M. E., B. J. Hayes and T. H. E. Meuwissen, 2011 Using the genomic relationship  
557 matrix to predict the accuracy of genomic selection. *J. Anim. Breed. Genet.* 128: 409-  
558 421.
- 559 Groenen, M. A., P. Wahlberg, M. Foglio, H. H. Cheng, H.-J. Megens, *et al.*, 2009 A high-  
560 density SNP-based linkage map of the chicken genome reveals sequence features  
561 correlated with recombination rate. *Genome Res.* 19: 510-519.
- 562 Groenen, M. A., H.-J. Megens, Y. Zare, W. C. Warren, L. W. Hillier, *et al.*, 2011 The  
563 development and characterization of a 60K SNP chip for chicken. *BMC Genomics* 12:  
564 274.
- 565 Heifetz, E. M., J. E. Fulton, N. O'Sullivan, H. Zhao, J. C. M. Dekkers, *et al.*, 2005 Extent and  
566 consistency across generations of linkage disequilibrium in commercial layer chicken  
567 breeding populations. *Genetics* 171: 1173-1181.

- 568 Hill, W. G. and A. Robertson, 1968 Linkage disequilibrium in finite populations. *Theor.*  
569 *Appl. Genet.* 38: 226-231.
- 570 Hill, W. G., 1993 Variation in genetic identity within kinships. *Heredity* 71: 652-653.
- 571 Huang, H., J. J. Windig, A. Vereijken and M. P. Calus, 2014 Genomic prediction based on  
572 data from three layer lines using non-linear regression models. *Genet. Sel. Evol.* 46: 75.
- 573 Ihara, N., A. Takasuga, K. Mizoshita, H. Takeda, M. Sugimoto, *et al.*, 2004 A comprehensive  
574 genetic map of the cattle genome based on 3802 microsatellites. *Genome Res.* 14: 1987-  
575 1998.
- 576 Karoui, S., M. Carabaño, C. Díaz and A. Legarra, 2012 Joint genomic evaluation of French  
577 dairy cattle breeds using multiple-trait models. *Genet. Sel. Evol.* 44: 39.
- 578 Kemper, K. E. and M. E. Goddard, 2012 Understanding and predicting complex traits:  
579 Knowledge from cattle. *Hum. Mol. Genet.* 21: R45-R51.
- 580 Kemper, K. E., B. J. Hayes, H. D. Daetwyler and M. E. Goddard, 2015 How old are  
581 quantitative trait loci and how widely do they segregate? *J. Anim. Breed. Genet.* 132:  
582 121-134.
- 583 Krag, K., N. A. Poulsen, M. K. Larsen, L. B. Larsen, L. L. Janss, *et al.*, 2013 Genetic  
584 parameters for milk fatty acids in Danish Holstein cattle based on SNP markers using a  
585 Bayesian approach. *BMC Genet.* 14: 79.
- 586 Lee, S. H. and J. H. J. van der Werf, 2016 MTG2: an efficient algorithm for multivariate  
587 linear mixed model analysis based on genomic information. *Bioinformatics* 32: 1420-  
588 1422.
- 589 Lehermeier, C., N. Krämer, E. Bauer, C. Bauland, C. Camisan, *et al.*, 2014 Usefulness of  
590 multiparental populations of maize (*Zea mays* L.) for genome-based prediction.  
591 *Genetics* 198: 3-16.

- 592 Lehermeier, C., C.-C. Schön and G. De los Campos, 2015 Assessment of genetic  
593 heterogeneity in structured plant populations using multivariate whole-genome  
594 regression models. *Genetics* 201: 323-337.
- 595 Matsuzaki, H., S. Dong, H. Loi, X. Di, G. Liu, *et al.*, 2004 Genotyping over 100,000 SNPs on  
596 a pair of oligonucleotide arrays. *Nat. Meth.* 1: 109-111.
- 597 Matukumalli, L. K., C. T. Lawley, R. D. Schnabel, J. F. Taylor, M. F. Allan, *et al.*, 2009  
598 Development and characterization of a high density SNP genotyping assay for cattle.  
599 *PLoS ONE* 4: e5350.
- 600 Powell, J. E., P. M. Visscher and M. E. Goddard, 2010 Reconciling the analysis of IBD and  
601 IBS in complex trait studies. *Nat. Rev. Gen.* 11: 800-805.
- 602 Pritchard, J. K. and M. Przeworski, 2001 Linkage disequilibrium in humans: Models and data.  
603 *Am. J. Hum. Genet.* 69: 1-14.
- 604 Ramos, A. M., R. P. M. A. Crooijmans, N. A. Affara, A. J. Amaral, A. L. Archibald, *et al.*,  
605 2009 Design of a high density SNP genotyping assay in the pig using SNPs identified  
606 and characterized by next generation sequencing technology. *PLoS ONE* 4: e6524.
- 607 Sargolzaei, M. and F. S. Schenkel, 2009 QMSim: a large-scale genome simulator for  
608 livestock. *Bioinformatics* 25: 680-681.
- 609 Sawyer, S. L., N. Mukherjee, A. J. Pakstis, L. Feuk, J. R. Kidd, *et al.*, 2005 Linkage  
610 disequilibrium patterns vary substantially among populations. *Europ. J. Hum. Genet.*  
611 13: 677-686.
- 612 Shifman, S., J. Kuypers, M. Kokoris, B. Yakir and A. Darvasi, 2003 Linkage disequilibrium  
613 patterns of the human genome across populations. *Hum. Mol. Genet.* 12: 771-776.
- 614 Sørensen, L. P., L. Janss, P. Madsen, T. Mark and M. S. Lund, 2012 Estimation of  
615 (co)variances for genomic regions of flexible sizes: application to complex infectious  
616 udder diseases in dairy cattle. *Genet. Sel. Evol.* 44: 18.

- 617 Speed, D., G. Hemani, Michael R. Johnson and David J. Balding, 2012 Improved heritability  
618 estimation from genome-wide SNPs. *Am. J. Hum. Genet.* 91: 1011-1021.
- 619 Trzaskowski, M., O. S. P. Davis, J. C. DeFries, J. Yang, P. M. Visscher, *et al.*, 2013 DNA  
620 evidence for strong genome-wide pleiotropy of cognitive and learning abilities. *Behav.*  
621 *Genet.* 43: 267-273.
- 622 Veerkamp, R. F., H. A. Mulder, R. Thompson and M. P. L. Calus, 2011 Genomic and  
623 pedigree-based genetic parameters for scarcely recorded traits when some animals are  
624 genotyped. *J. Dairy Sci.* 94: 4189-4197.
- 625 Veroneze, R., P. S. Lopes, S. E. F. Guimarães, F. F. Silva, M. S. Lopes, *et al.*, 2013 Linkage  
626 disequilibrium and haplotype block structure in six commercial pig lines. *J. Anim. Sci.*  
627 91: 3493-3501.
- 628 Veroneze, R., J. W. Bastiaansen, E. F. Knol, S. E. Guimarães, F. F. Silva, *et al.*, 2014 Linkage  
629 disequilibrium patterns and persistence of phase in purebred and crossbred pig (*Sus*  
630 *scrofa*) populations. *BMC Genet.* 15: 126.
- 631 Visscher, P. M., G. Hemani, A. A. E. Vinkhuyzen, G.-B. Chen, S. H. Lee, *et al.*, 2014  
632 Statistical power to detect genetic (co)variance of complex traits using SNP data in  
633 unrelated samples. *PLoS Genet* 10: e1004269.
- 634 Wientjes, Y. C. J., R. F. Veerkamp and M. P. L. Calus, 2013 The effect of linkage  
635 disequilibrium and family relationships on the reliability of genomic prediction.  
636 *Genetics* 193: 621-631.
- 637 Wientjes, Y. C. J., R. F. Veerkamp, P. Bijma, H. Bovenhuis, C. Schrooten, *et al.*, 2015  
638 Empirical and deterministic accuracies of across-population genomic prediction. *Genet.*  
639 *Sel. Evol.* 47: 5.

- 640 Wientjes, Y. C. J., P. Bijma, R. F. Veerkamp and M. P. L. Calus, 2016 An equation to predict  
641 the accuracy of genomic values by combining data from multiple traits, breeds, lines, or  
642 environments. *Genetics* 202: 799-823.
- 643 Wientjes, Y. C. J., P. Bijma, J. Vandenplas and M. P. L. Calus, 2017 Multi-population  
644 genomic relationships for estimating current genetic variances within and genetic  
645 correlations between populations. *Genetics* 207: 503-515.
- 646 Yang, J., B. Benyamin, B. P. McEvoy, S. Gordon, A. K. Henders, *et al.*, 2010 Common SNPs  
647 explain a large proportion of the heritability for human height. *Nat. Genet.* 42: 565-569.
- 648 Yang, J., A. Bakshi, Z. Zhu, G. Hemani, A. A. E. Vinkhuyzen, *et al.*, 2015 Genetic variance  
649 estimation with imputed variants finds negligible missing heritability for human height  
650 and body mass index. *Nat. Genet.* 47: 1114-1120.
- 651 Yang, L., B. M. Neale, L. Liu, S. H. Lee, N. R. Wray, *et al.*, 2013 Polygenic transmission and  
652 complex neuro developmental network for attention deficit hyperactivity disorder:  
653 Genome-wide association study of both common and rare variants. *Am. J. Med. Genet.*  
654 162: 419-430.
- 655
- 656



657

## FIGURES

658

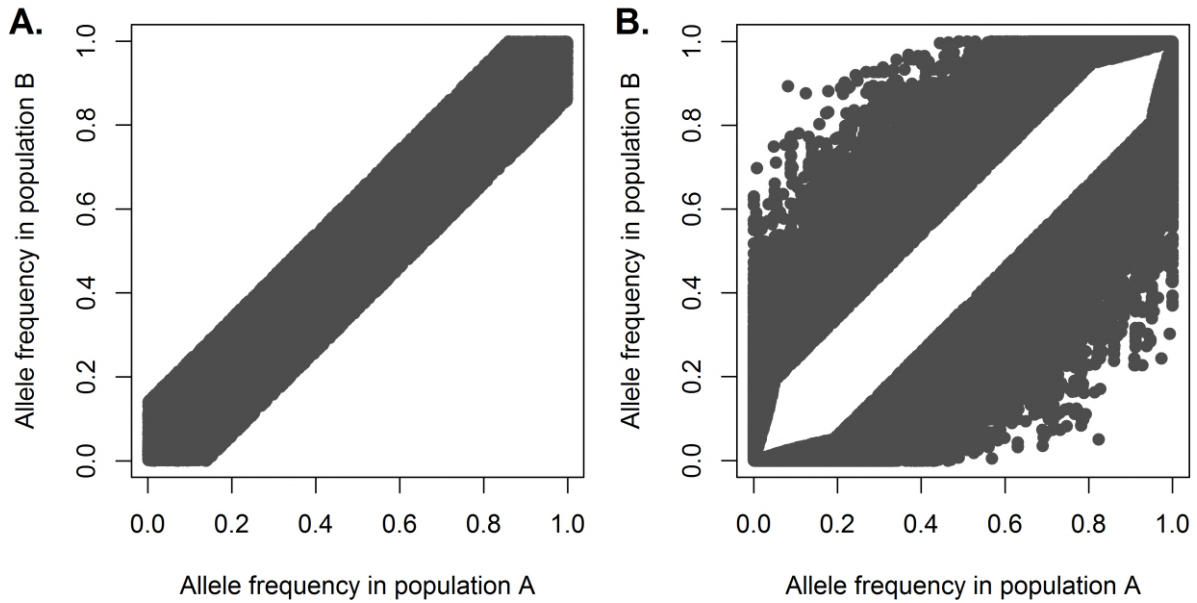

659

660

661

662

663

664

665

**Figure 1 - Allele frequencies of markers for two populations using two selection approaches.**

For one random replicate, allele frequencies of markers from both populations are plotted against each other when markers are selected to have (A.) similar allele frequencies in the two populations, or (B.) different allele frequencies in the two populations.

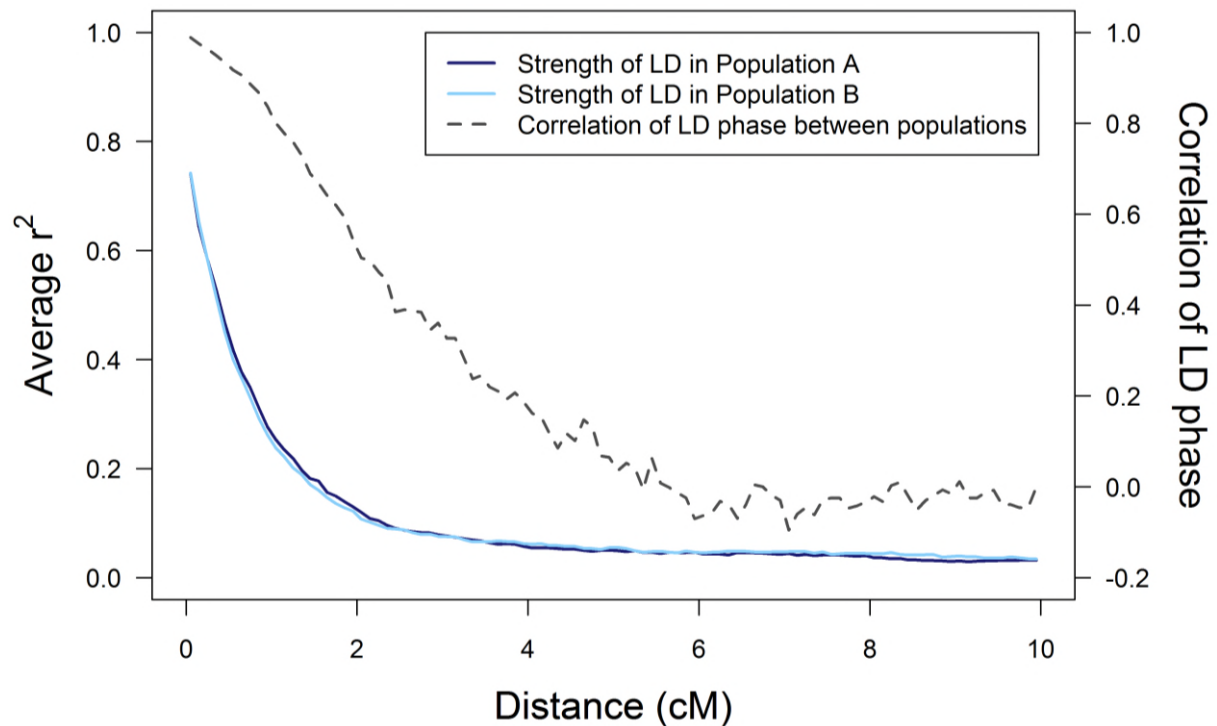

666

667 **Figure 2 - LD pattern in two populations and correlation of LD phase between the**  
668 **populations.**

669 The average LD ( $r^2$ ) between causal loci and markers for both populations, and the correlation  
670 of LD-phase (correlation of  $r$ ) between the populations, as a function of distance between  
671 causal loci and markers for one random replicate.

672

### A. Populations with similar allele frequencies of both markers and causal loci

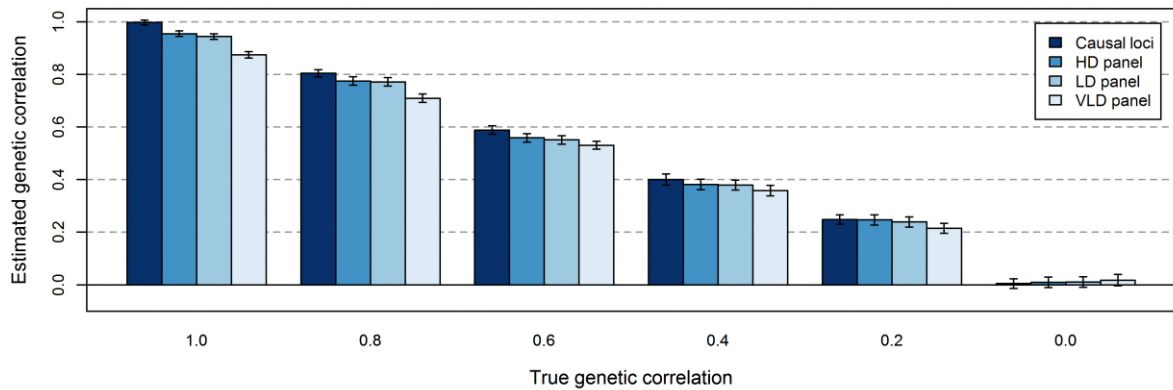

### B. Populations with similar allele frequencies of markers and different allele frequencies of causal loci

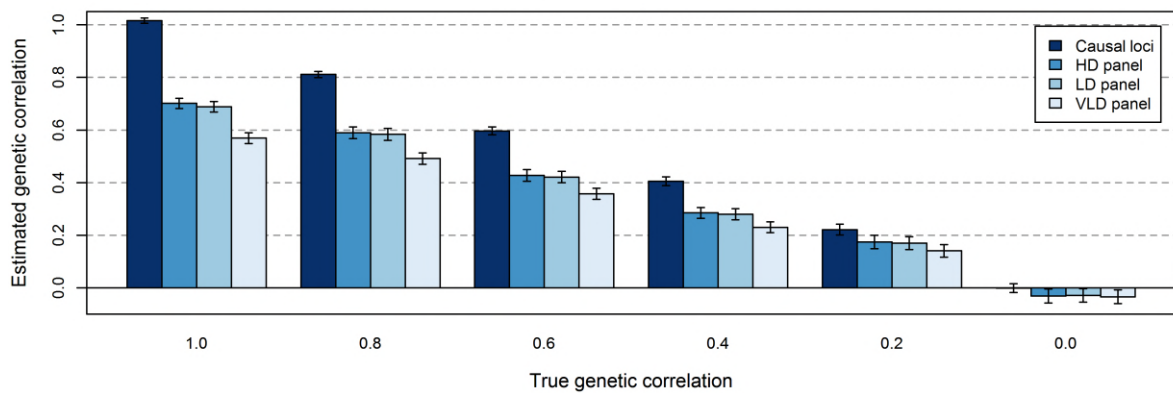

### C. Populations with different allele frequencies of both markers and causal loci

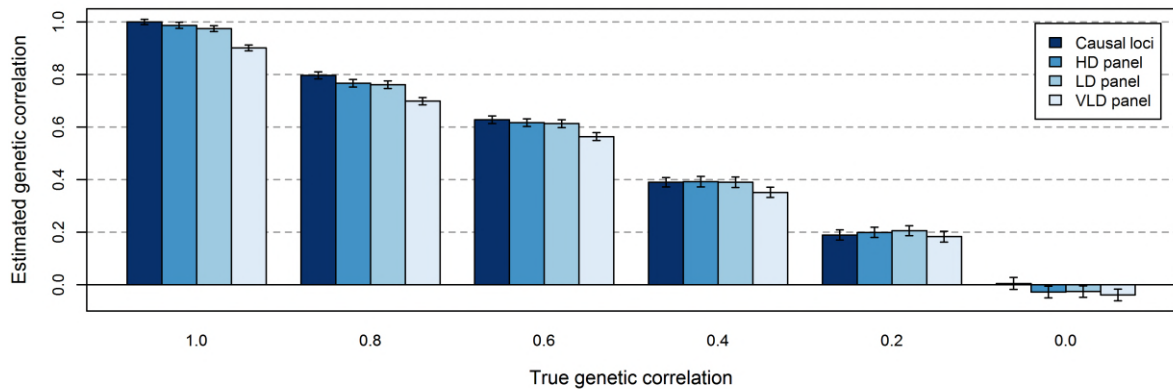

673

674 **Figure 3 - Estimated genetic correlations between populations without regressing the**  
675 **genomic relationship matrix.**

676 The average estimated genetic correlation ( $\pm$  standard error) at different simulated genetic  
677 correlations for the scenario where (A.) markers and causal loci have similar allele  
678 frequencies in the two populations, (B.) markers have similar and causal loci different allele

679 frequencies in the two populations, or (C.) markers and causal loci have different allele  
680 frequencies in the two populations, when the genomic relationship matrix is either based on  
681 the genotypes of causal loci (2000), HDP (200 000), LDP (20 000), or VLDP (2000) markers  
682 without regression towards the pedigree relationship matrix. Standard errors were calculated  
683 as the standard deviation over replicates divided by the square root of the number of  
684 replicates.  
685

### A. Simulated genetic correlation of 0.8

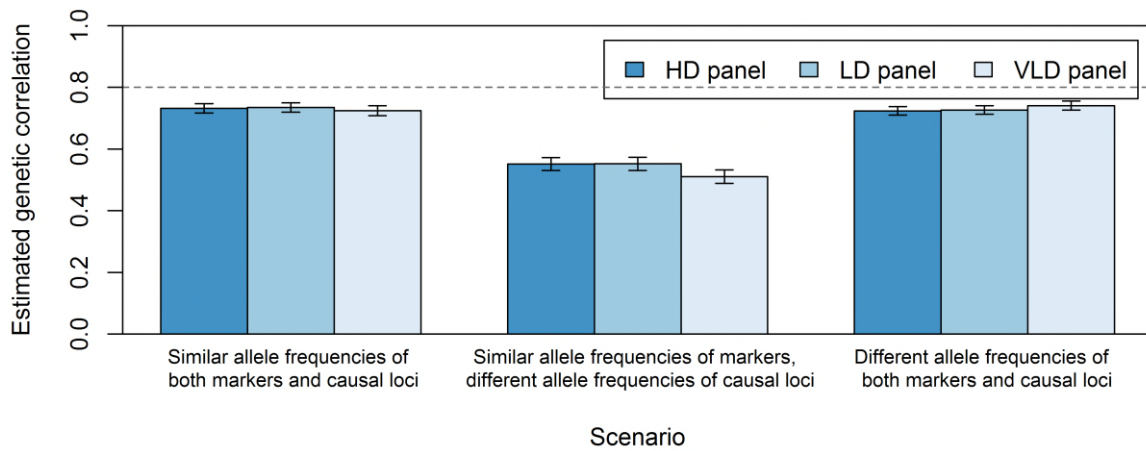

### B. Simulated genetic correlation of 0.4

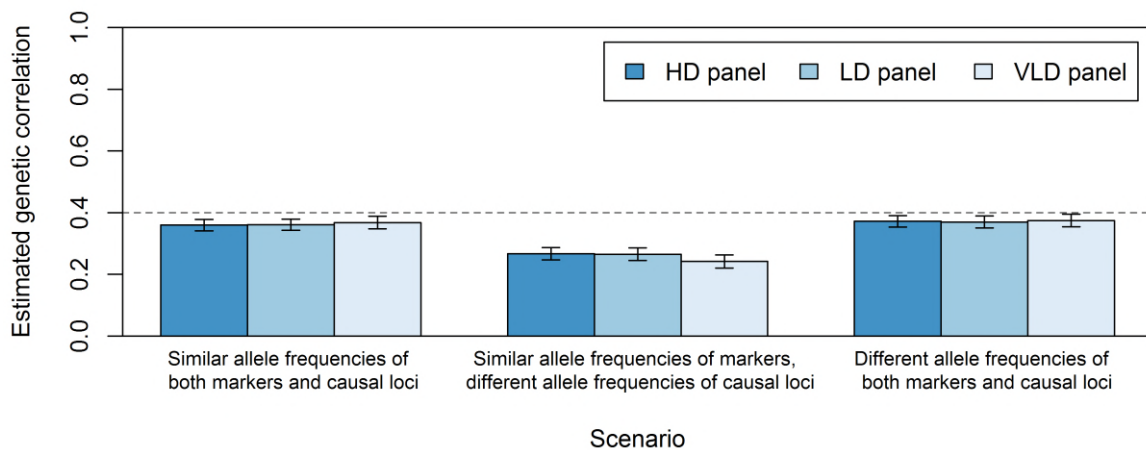

686

687 **Figure 4 - Estimated genetic correlations between populations with regression of the**  
688 **genomic relationship matrix.**

689 The average estimated genetic correlation ( $\pm$  standard error) at a simulated genetic correlation  
690 of (A.) 0.8 or (B.) 0.4 for the three scenarios with HDP (200 000), LDP (20 000), or VLDP  
691 (2000) markers and regression of **G** towards the pedigree relationship matrix. Standard errors  
692 were calculated as the standard deviation over replicates divided by the square root of the  
693 number of replicates.

694

**A. HD marker panel**

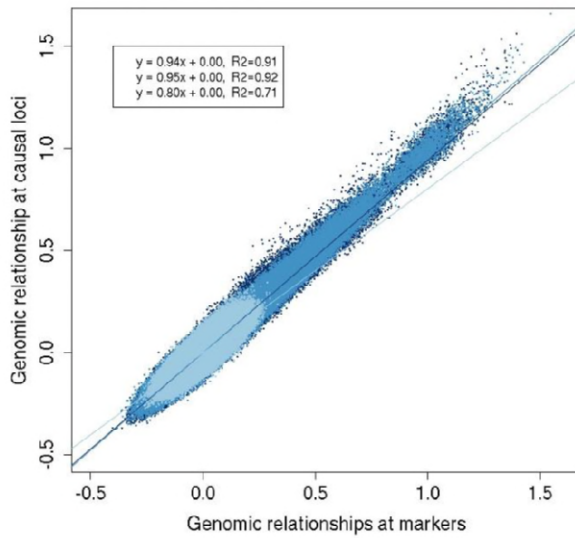

**B. LD marker panel**

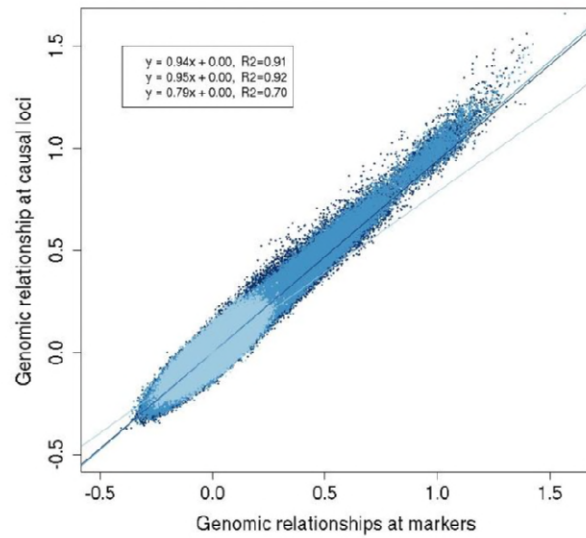

**C. VLD marker panel**

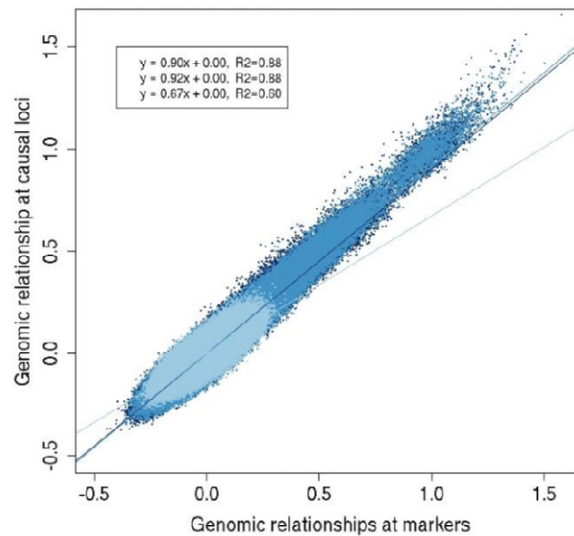

695

696 **Figure 5 - Genomic relationships at causal loci versus markers when causal loci have**  
697 **similar allele frequencies in the two populations.** The genomic relationships at the causal  
698 loci versus the genomic relationships based on (A.) HDP (200 000) markers, (B.) LDP (20  
699 000) markers, or (C.) VLDP (2000) markers, when markers and causal loci have similar allele  
700 frequencies in the two populations for one replicate. Relationships in population A are  
701 represented in dark blue (equation 1 of regression line and correlation), relationships in  
702 population B are represented in medium blue (equation 2 of regression line and correlation),  
703 and relationships between population A and B are represented in light blue (equation 3 of  
704 regression line and correlation).

**A. HD marker panel**

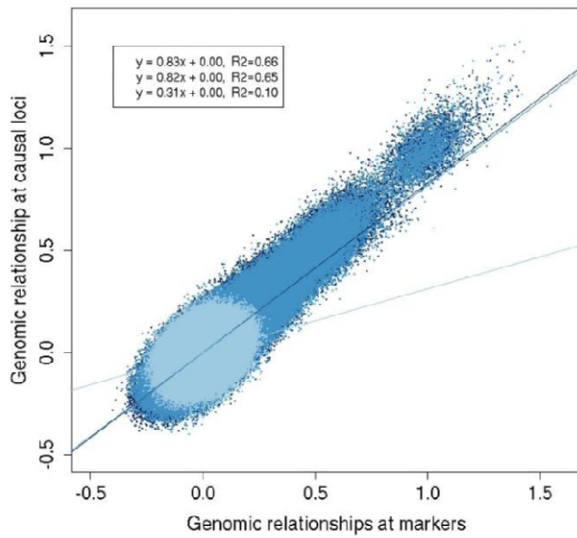

**B. LD marker panel**

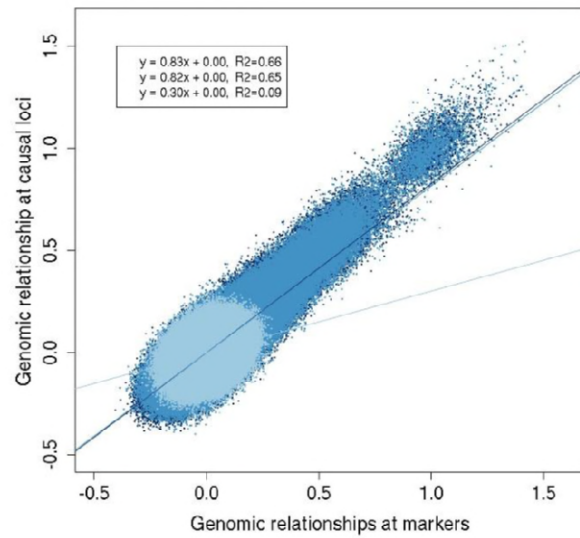

**C. VLD marker panel**

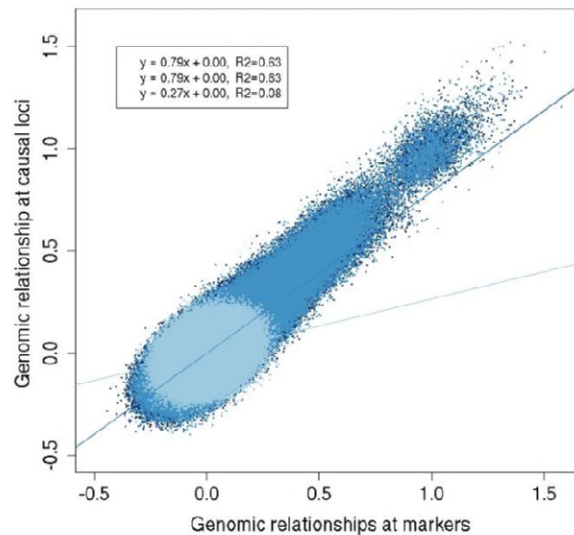

705

706 **Figure 6 - Genomic relationships at causal loci versus markers when causal loci have**

707 **different allele frequencies in the two populations.** The genomic relationships at the causal

708 loci versus the genomic relationships based on the (A.) HDP (200 000) markers, (B.) LDP (20

709 000) markers, or (C.) VLDP (2000) markers, when markers have similar and causal loci

710 different allele frequencies in the two populations for one replicate. Relationships in

711 population A are represented in dark blue (equation 1 of regression line and correlation),

712 relationships in population B are represented in medium blue (equation 2 of regression line

713 and correlation), and relationships between population A and B are represented in light blue

714 (equation 3 of regression line and correlation).

715



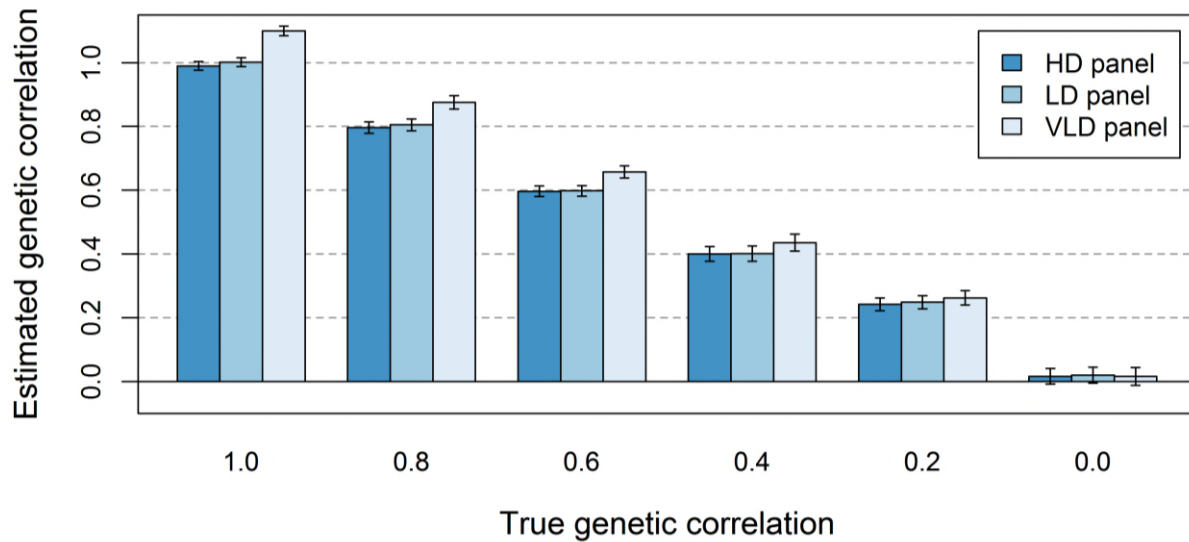

716

717 **Figure 7 - Estimated genetic correlations between populations after rescaling the**  
718 **marker-based genomic relationship matrix.**

719 The average estimated genetic correlation ( $\pm$  standard error) at different simulated genetic  
720 correlations for the scenario where markers and causal loci have similar allele frequencies in  
721 the two populations when the genomic relationship matrix is either based on the genotypes of  
722 HDP (200 000), LDP (20 000), or VLDP (2000) markers, after rescaling the marker-based  
723 relationships using a regression coefficient based on the relationships at causal loci. Standard  
724 errors were calculated as the standard deviation over replicates divided by the square root of  
725 the number of replicates.

726

727

728

729
